# Supplementary material for: HIF-Overexpression and Pro-Inflammatory Priming in Human Mesenchymal Stromal Cells Improves the Healing Properties of Extracellular Vesicles in Experimental Crohn’s Disease
Source: MDPI journal article supplement (doi:10.3390/ijms222011269), 2021-10-19
Supplement: s1 [file s1]

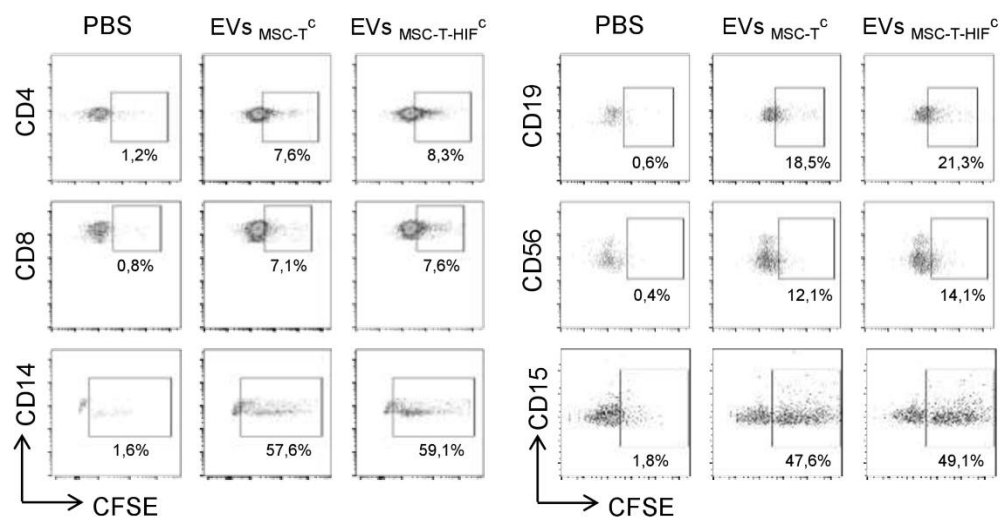

**Supplementary Figure S1.** Representative dot plots show the percentage of CFSE- labeled EV uptake by T-cells (CD4<sup>+</sup> and CD8<sup>+</sup>), B-cells (CD19<sup>+</sup>), monocytes (CD14<sup>+</sup>), NK cells (CD56<sup>+</sup>) and neutrophils (CD15<sup>+</sup>).

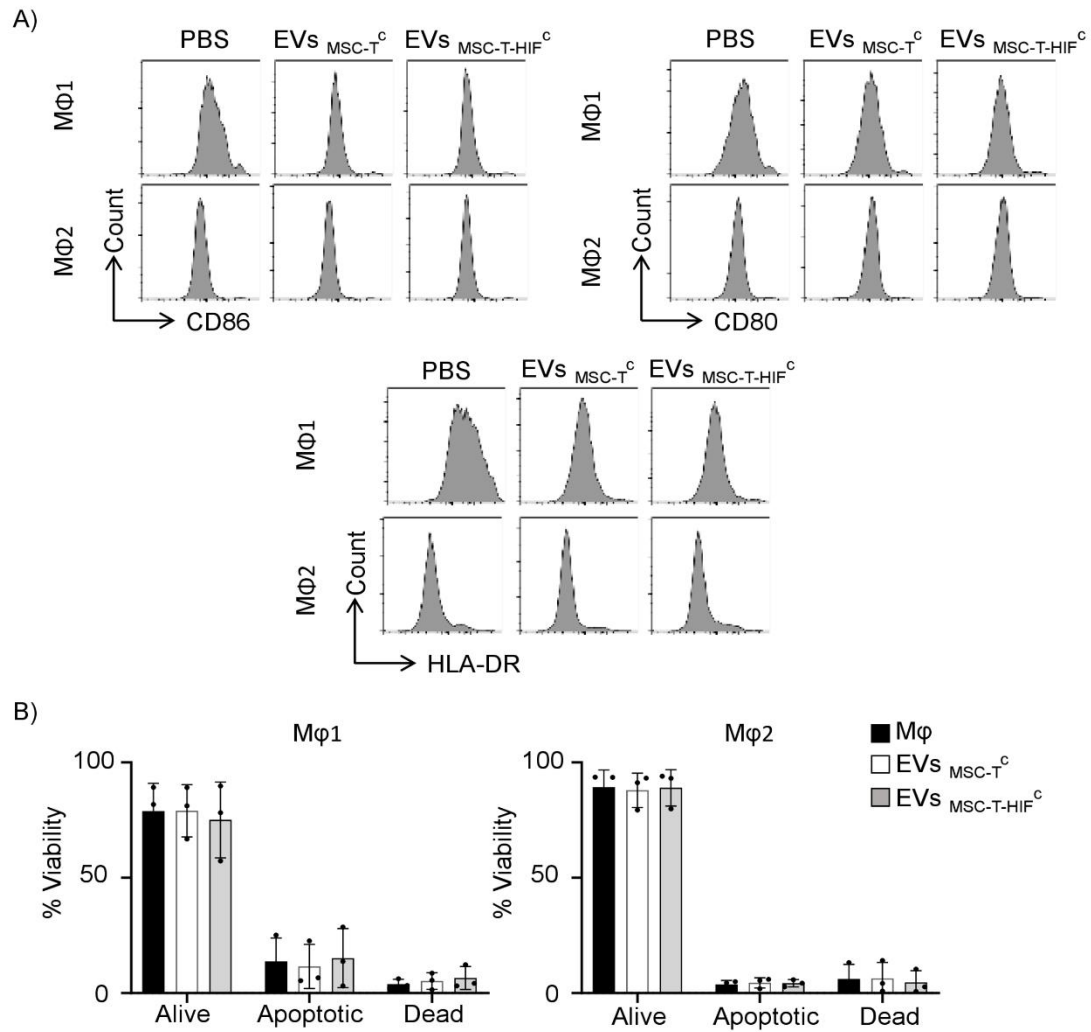

**Supplementary Figure S2.** EV<sub>MSC-T<sup>C</sup></sub> and EV<sub>MSC-T-HIF<sup>C</sup></sub> do not affect the viability of differentiating macrophages. **(A)** Quantification of annexin V-FITC and propidium iodide positive cells. Graphs show viable, apoptotic and dead macrophages after M1/M2 differentiation in presence or not of EVs. **(B)** Representative dot plots of CD86, CD80 and HLA-DR expression assessed by flow cytometry after LPS-activation.

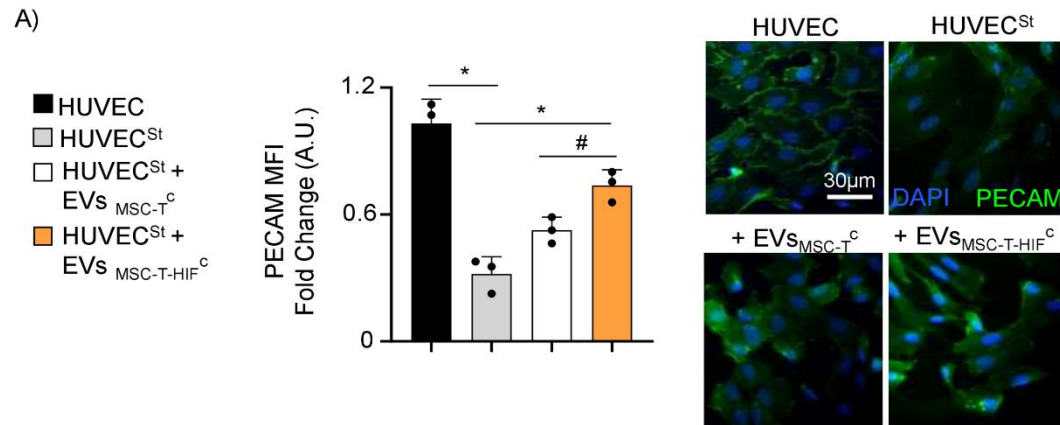

**Supplementary Figure S3.** Immunofluorescence of PECAM (CD31, green) and staining of nuclei (blue) to show distribution of PECAM in cell membrane. Scale bar: 30 μg. Bar graph shows quantification of green mean fluorescence intensity (MFI). Relative MFI was calculated by dividing all individual data by the MFI in unstimulated HUVECs. Graphs represent mean ± SD of fold change of three independent experiments. One-way ANOVA with Geisser-Greenhouse correction was used for statistical analysis.
